# Supplementary material for: Worksite environment physical activity and healthy food choices: measurement of the worksite food and physical activity environment at four metropolitan bus garages
Source: PubMed Central journal article supplement (PMC1876805; doi:10.1186/1479-5868-4-17), 2007-05-11
Supplement: 1479-5868-4-17-S1.pdf [file 1479-5868-4-17-S1.pdf]

# OPERATOR

|             |                                                                                                                                                                                                                  |   |   |   |   |    |
|-------------|------------------------------------------------------------------------------------------------------------------------------------------------------------------------------------------------------------------|---|---|---|---|----|
| Garage      | 1                                                                                                                                                                                                                | 2 | 3 | 4 | 5 | 14 |
| Date        | ____/____/____                                                                                                                                                                                                   |   |   |   |   | 30 |
| Route H ID: | <div style="display: inline-block; width: 20px; height: 20px; border: 1px solid black; margin-right: 5px;"></div> <div style="display: inline-block; width: 20px; height: 20px; border: 1px solid black;"></div> |   |   |   |   | 15 |

## Garage Environmental Assessment Form: General Garage and Operator Indoor Areas

**Observer Instructions:** Complete one form for the operator/general garage areas (exclude maintenance area).

### 1. COMMONS/BREAK ROOM

|                         | Number of items                                                                                                                                                                                                  | Condition of items*                                                                            | Notes |    |
|-------------------------|------------------------------------------------------------------------------------------------------------------------------------------------------------------------------------------------------------------|------------------------------------------------------------------------------------------------|-------|----|
| a. Water cooler         | <div style="display: inline-block; width: 20px; height: 20px; border: 1px solid black; margin-right: 5px;"></div> <div style="display: inline-block; width: 20px; height: 20px; border: 1px solid black;"></div> | <div style="display: inline-block; width: 20px; height: 20px; border: 1px solid black;"></div> |       | 36 |
| b. Microwave            | <div style="display: inline-block; width: 20px; height: 20px; border: 1px solid black; margin-right: 5px;"></div> <div style="display: inline-block; width: 20px; height: 20px; border: 1px solid black;"></div> | <div style="display: inline-block; width: 20px; height: 20px; border: 1px solid black;"></div> |       | 39 |
| c. Refrigerator/freezer | <div style="display: inline-block; width: 20px; height: 20px; border: 1px solid black; margin-right: 5px;"></div> <div style="display: inline-block; width: 20px; height: 20px; border: 1px solid black;"></div> | <div style="display: inline-block; width: 20px; height: 20px; border: 1px solid black;"></div> |       | 42 |
| d. Stove                | <div style="display: inline-block; width: 20px; height: 20px; border: 1px solid black; margin-right: 5px;"></div> <div style="display: inline-block; width: 20px; height: 20px; border: 1px solid black;"></div> | <div style="display: inline-block; width: 20px; height: 20px; border: 1px solid black;"></div> |       | 45 |
| e. Sink                 | <div style="display: inline-block; width: 20px; height: 20px; border: 1px solid black; margin-right: 5px;"></div> <div style="display: inline-block; width: 20px; height: 20px; border: 1px solid black;"></div> | <div style="display: inline-block; width: 20px; height: 20px; border: 1px solid black;"></div> |       | 48 |
| f. Food cart            | <div style="display: inline-block; width: 20px; height: 20px; border: 1px solid black; margin-right: 5px;"></div> <div style="display: inline-block; width: 20px; height: 20px; border: 1px solid black;"></div> | <div style="display: inline-block; width: 20px; height: 20px; border: 1px solid black;"></div> |       | 51 |
| g. Radio                | <div style="display: inline-block; width: 20px; height: 20px; border: 1px solid black; margin-right: 5px;"></div> <div style="display: inline-block; width: 20px; height: 20px; border: 1px solid black;"></div> | <div style="display: inline-block; width: 20px; height: 20px; border: 1px solid black;"></div> |       | 54 |
| h. Television           | <div style="display: inline-block; width: 20px; height: 20px; border: 1px solid black; margin-right: 5px;"></div> <div style="display: inline-block; width: 20px; height: 20px; border: 1px solid black;"></div> | <div style="display: inline-block; width: 20px; height: 20px; border: 1px solid black;"></div> |       | 57 |
| i. Video game machine   | <div style="display: inline-block; width: 20px; height: 20px; border: 1px solid black; margin-right: 5px;"></div> <div style="display: inline-block; width: 20px; height: 20px; border: 1px solid black;"></div> | <div style="display: inline-block; width: 20px; height: 20px; border: 1px solid black;"></div> |       | 60 |
| j. Scale (body weight)  | <div style="display: inline-block; width: 20px; height: 20px; border: 1px solid black; margin-right: 5px;"></div> <div style="display: inline-block; width: 20px; height: 20px; border: 1px solid black;"></div> | <div style="display: inline-block; width: 20px; height: 20px; border: 1px solid black;"></div> |       | 63 |
| k. Vending machines     |                                                                                                                                                                                                                  |                                                                                                |       |    |
| l. Refrigerated food    | <div style="display: inline-block; width: 20px; height: 20px; border: 1px solid black; margin-right: 5px;"></div> <div style="display: inline-block; width: 20px; height: 20px; border: 1px solid black;"></div> |                                                                                                |       | 66 |
| m. Snack food           | <div style="display: inline-block; width: 20px; height: 20px; border: 1px solid black; margin-right: 5px;"></div> <div style="display: inline-block; width: 20px; height: 20px; border: 1px solid black;"></div> |                                                                                                |       | 68 |
| n. Cold beverage        | <div style="display: inline-block; width: 20px; height: 20px; border: 1px solid black; margin-right: 5px;"></div> <div style="display: inline-block; width: 20px; height: 20px; border: 1px solid black;"></div> |                                                                                                |       | 70 |
| o. Hot beverage         | <div style="display: inline-block; width: 20px; height: 20px; border: 1px solid black; margin-right: 5px;"></div> <div style="display: inline-block; width: 20px; height: 20px; border: 1px solid black;"></div> |                                                                                                |       | 72 |

(\*condition codes: 1=good, 2=average, 3=poor, 4=out of service)

## 1. COMMONS/BREAK ROOM (continued)

|                               | Present                    | Not Present                |    |
|-------------------------------|----------------------------|----------------------------|----|
| p. Food prep/counter space    | 1 <input type="checkbox"/> | 2 <input type="checkbox"/> | 74 |
| q. Tables                     | 1 <input type="checkbox"/> | 2 <input type="checkbox"/> | 75 |
| r. Chairs                     | 1 <input type="checkbox"/> | 2 <input type="checkbox"/> | 76 |
| s. Physical activity media    | 1 <input type="checkbox"/> | 2 <input type="checkbox"/> | 77 |
| t. Nutrition media            | 1 <input type="checkbox"/> | 2 <input type="checkbox"/> | 78 |
| u. Weight management media    | 1 <input type="checkbox"/> | 2 <input type="checkbox"/> | 79 |
| v. Other health-related media | 1 <input type="checkbox"/> | 2 <input type="checkbox"/> | 80 |

## 2. EXERCISE ROOM

1 ☐ Not applicable, go to next section

81

|                        | Number of items                           | Condition of items*  | Notes |     |
|------------------------|-------------------------------------------|----------------------|-------|-----|
| a. Indoor bike         | <input type="text"/> <input type="text"/> | <input type="text"/> |       | 82  |
| b. Row machine         | <input type="text"/> <input type="text"/> | <input type="text"/> |       | 85  |
| c. Elliptical machine  | <input type="text"/> <input type="text"/> | <input type="text"/> |       | 88  |
| d. Treadmill           | <input type="text"/> <input type="text"/> | <input type="text"/> |       | 91  |
| e. Stair stepper       | <input type="text"/> <input type="text"/> | <input type="text"/> |       | 94  |
| f. Weight lift machine | <input type="text"/> <input type="text"/> | <input type="text"/> |       | 97  |
| g. Free weights        | <input type="text"/> <input type="text"/> | <input type="text"/> |       | 100 |
| h. Mat                 | <input type="text"/> <input type="text"/> | <input type="text"/> |       | 103 |
| i. Ball, fitness       | <input type="text"/> <input type="text"/> | <input type="text"/> |       | 106 |
| j. Scale (body weight) | <input type="text"/> <input type="text"/> | <input type="text"/> |       | 109 |
| k. Radio               | <input type="text"/> <input type="text"/> | <input type="text"/> |       | 112 |
| l. Television          | <input type="text"/> <input type="text"/> | <input type="text"/> |       | 115 |
| m. Video game machine  | <input type="text"/> <input type="text"/> | <input type="text"/> |       | 118 |

(\*condition codes: 1=good, 2=average, 3=poor, 4=out of service)

| <b>2. EXERCISE ROOM (continued)</b> | <b>Present</b>             | <b>Not Present</b>         |
|-------------------------------------|----------------------------|----------------------------|
| n. Physical activity media          | 1 <input type="checkbox"/> | 2 <input type="checkbox"/> |
| o. Nutrition media                  | 1 <input type="checkbox"/> | 2 <input type="checkbox"/> |
| p. Weight management media          | 1 <input type="checkbox"/> | 2 <input type="checkbox"/> |
| q. Other health-related media       | 1 <input type="checkbox"/> | 2 <input type="checkbox"/> |

121-124

### 3. INSIDE GARAGE: GENERAL AREAS

|                          | <b>Number of items</b>                    | <b>Condition of items*</b> | <b>Notes</b> |     |
|--------------------------|-------------------------------------------|----------------------------|--------------|-----|
| a. Stairwell             | <input type="text"/> <input type="text"/> | <input type="text"/>       |              | 125 |
| b. Scale (body weight)   | <input type="text"/> <input type="text"/> | <input type="text"/>       |              | 128 |
| c. Walking area          | <input type="text"/> <input type="text"/> | <input type="text"/>       |              | 131 |
| d. Basketball hoop/court | <input type="text"/> <input type="text"/> | <input type="text"/>       |              | 134 |
| e. Bicycle               | <input type="text"/> <input type="text"/> | <input type="text"/>       |              | 137 |
| f. Bike rack             | <input type="text"/> <input type="text"/> | <input type="text"/>       |              | 140 |

(\*condition codes: 1=good, 2=average, 3=poor, 4=out of service)

|                               | <b>Present</b>             | <b>Not Present</b>         |
|-------------------------------|----------------------------|----------------------------|
| g. Men's lockers, operators   | 1 <input type="checkbox"/> | 2 <input type="checkbox"/> |
| h. Women's lockers, operators | 1 <input type="checkbox"/> | 2 <input type="checkbox"/> |
| i. Men's showers, operators   | 1 <input type="checkbox"/> | 2 <input type="checkbox"/> |
| j. Women's showers, operators | 1 <input type="checkbox"/> | 2 <input type="checkbox"/> |

143-146

**Observer:** Ask Garage Coordinator for the following social environment information via email. Email the text and fill out this form after the coordinator replies to your email.

## 4. SOCIAL ENVIRONMENT

Garage Coordinator interviewed: \_\_\_\_\_

| Event                                                                                                 | Yes                        | No                         | Number of events<br>(last 3 months)       | Notes   |
|-------------------------------------------------------------------------------------------------------|----------------------------|----------------------------|-------------------------------------------|---------|
| a. Parties, potlucks, work meetings, seminars, special occasions where <b>food</b> was available      | 1 <input type="checkbox"/> | 2 <input type="checkbox"/> | <input type="text"/> <input type="text"/> | 147-149 |
| b. PA clubs, competitions, fundraisers (e.g., exercise club; fun run; 10,000 steps)                   | 1 <input type="checkbox"/> | 2 <input type="checkbox"/> | <input type="text"/> <input type="text"/> | 150-152 |
| c. Food/nutrition clubs, competitions, fundraisers, classes (e.g., recipe, gardening or cooking club) | 1 <input type="checkbox"/> | 2 <input type="checkbox"/> | <input type="text"/> <input type="text"/> | 153-155 |
| d. Weight management clubs, competitions, fundraisers, classes (e.g., Weight Watchers, the Big Loser) | 1 <input type="checkbox"/> | 2 <input type="checkbox"/> | <input type="text"/> <input type="text"/> | 156-158 |
| e. Other (please specify):<br>_____                                                                   | 1 <input type="checkbox"/> | 2 <input type="checkbox"/> | <input type="text"/> <input type="text"/> | 159-161 |

# MAINTENANCE

|             |                                                                                                                                                                                                                  |   |   |   |   |    |
|-------------|------------------------------------------------------------------------------------------------------------------------------------------------------------------------------------------------------------------|---|---|---|---|----|
| Garage      | 1                                                                                                                                                                                                                | 2 | 3 | 4 | 5 | 14 |
| Date        | ____/____/____                                                                                                                                                                                                   |   |   |   |   | 30 |
| Route H ID: | <div style="display: inline-block; width: 20px; height: 20px; border: 1px solid black; margin-right: 5px;"></div> <div style="display: inline-block; width: 20px; height: 20px; border: 1px solid black;"></div> |   |   |   |   | 15 |

## Garage Environmental Assessment Form: Maintenance Area

**Observer Instructions:** Complete one form for the maintenance area.

### 1. BREAK ROOM

|                             | Number of items                                                                                                                                                                                                  | Condition of items*                                                                            | Notes |    |
|-----------------------------|------------------------------------------------------------------------------------------------------------------------------------------------------------------------------------------------------------------|------------------------------------------------------------------------------------------------|-------|----|
| a. Water cooler             | <div style="display: inline-block; width: 20px; height: 20px; border: 1px solid black; margin-right: 5px;"></div> <div style="display: inline-block; width: 20px; height: 20px; border: 1px solid black;"></div> | <div style="display: inline-block; width: 20px; height: 20px; border: 1px solid black;"></div> |       | 36 |
| b. Microwave                | <div style="display: inline-block; width: 20px; height: 20px; border: 1px solid black; margin-right: 5px;"></div> <div style="display: inline-block; width: 20px; height: 20px; border: 1px solid black;"></div> | <div style="display: inline-block; width: 20px; height: 20px; border: 1px solid black;"></div> |       | 39 |
| c. Refrigerator/freezer     | <div style="display: inline-block; width: 20px; height: 20px; border: 1px solid black; margin-right: 5px;"></div> <div style="display: inline-block; width: 20px; height: 20px; border: 1px solid black;"></div> | <div style="display: inline-block; width: 20px; height: 20px; border: 1px solid black;"></div> |       | 42 |
| d. Stove                    | <div style="display: inline-block; width: 20px; height: 20px; border: 1px solid black; margin-right: 5px;"></div> <div style="display: inline-block; width: 20px; height: 20px; border: 1px solid black;"></div> | <div style="display: inline-block; width: 20px; height: 20px; border: 1px solid black;"></div> |       | 45 |
| e. Sink                     | <div style="display: inline-block; width: 20px; height: 20px; border: 1px solid black; margin-right: 5px;"></div> <div style="display: inline-block; width: 20px; height: 20px; border: 1px solid black;"></div> | <div style="display: inline-block; width: 20px; height: 20px; border: 1px solid black;"></div> |       | 48 |
| f. Food cart                | <div style="display: inline-block; width: 20px; height: 20px; border: 1px solid black; margin-right: 5px;"></div> <div style="display: inline-block; width: 20px; height: 20px; border: 1px solid black;"></div> | <div style="display: inline-block; width: 20px; height: 20px; border: 1px solid black;"></div> |       | 51 |
| g. Radio                    | <div style="display: inline-block; width: 20px; height: 20px; border: 1px solid black; margin-right: 5px;"></div> <div style="display: inline-block; width: 20px; height: 20px; border: 1px solid black;"></div> | <div style="display: inline-block; width: 20px; height: 20px; border: 1px solid black;"></div> |       | 54 |
| h. Television               | <div style="display: inline-block; width: 20px; height: 20px; border: 1px solid black; margin-right: 5px;"></div> <div style="display: inline-block; width: 20px; height: 20px; border: 1px solid black;"></div> | <div style="display: inline-block; width: 20px; height: 20px; border: 1px solid black;"></div> |       | 57 |
| i. Video game machine       | <div style="display: inline-block; width: 20px; height: 20px; border: 1px solid black; margin-right: 5px;"></div> <div style="display: inline-block; width: 20px; height: 20px; border: 1px solid black;"></div> | <div style="display: inline-block; width: 20px; height: 20px; border: 1px solid black;"></div> |       | 60 |
| j. Scale (body weight)      | <div style="display: inline-block; width: 20px; height: 20px; border: 1px solid black; margin-right: 5px;"></div> <div style="display: inline-block; width: 20px; height: 20px; border: 1px solid black;"></div> | <div style="display: inline-block; width: 20px; height: 20px; border: 1px solid black;"></div> |       | 63 |
| k. Vending machines         |                                                                                                                                                                                                                  |                                                                                                |       |    |
| l. <i>Refrigerated food</i> | <div style="display: inline-block; width: 20px; height: 20px; border: 1px solid black; margin-right: 5px;"></div> <div style="display: inline-block; width: 20px; height: 20px; border: 1px solid black;"></div> |                                                                                                |       | 66 |
| m. <i>Snack food</i>        | <div style="display: inline-block; width: 20px; height: 20px; border: 1px solid black; margin-right: 5px;"></div> <div style="display: inline-block; width: 20px; height: 20px; border: 1px solid black;"></div> |                                                                                                |       | 68 |
| n. <i>Cold beverage</i>     | <div style="display: inline-block; width: 20px; height: 20px; border: 1px solid black; margin-right: 5px;"></div> <div style="display: inline-block; width: 20px; height: 20px; border: 1px solid black;"></div> |                                                                                                |       | 70 |
| o. <i>Hot beverage</i>      | <div style="display: inline-block; width: 20px; height: 20px; border: 1px solid black; margin-right: 5px;"></div> <div style="display: inline-block; width: 20px; height: 20px; border: 1px solid black;"></div> |                                                                                                |       | 72 |

(\*condition codes: 1=good, 2=average, 3=poor, 4=out of service)

| <b>BREAK ROOM (continued)</b> | <b>Present</b>             | <b>Not Present</b>         |
|-------------------------------|----------------------------|----------------------------|
| p. Food prep/counter space    | 1 <input type="checkbox"/> | 2 <input type="checkbox"/> |
| q. Tables                     | 1 <input type="checkbox"/> | 2 <input type="checkbox"/> |
| r. Chairs                     | 1 <input type="checkbox"/> | 2 <input type="checkbox"/> |
| s. Physical activity media    | 1 <input type="checkbox"/> | 2 <input type="checkbox"/> |
| t. Nutrition media            | 1 <input type="checkbox"/> | 2 <input type="checkbox"/> |
| u. Weight management media    | 1 <input type="checkbox"/> | 2 <input type="checkbox"/> |
| v. Other health-related media | 1 <input type="checkbox"/> | 2 <input type="checkbox"/> |

74-80

## 2. INSIDE GARAGE & BAY AREA - MAINTENANCE

|                                 | <b>Present</b>             | <b>Not Present</b>         |
|---------------------------------|----------------------------|----------------------------|
| a. Men's lockers, maintenance   | 1 <input type="checkbox"/> | 2 <input type="checkbox"/> |
| b. Women's lockers, maintenance | 1 <input type="checkbox"/> | 2 <input type="checkbox"/> |
| c. Men's showers, maintenance   | 1 <input type="checkbox"/> | 2 <input type="checkbox"/> |
| d. Women's showers, maintenance | 1 <input type="checkbox"/> | 2 <input type="checkbox"/> |
| e. Food truck                   | 1 <input type="checkbox"/> | 2 <input type="checkbox"/> |

81-85

|               |                                                                                                                                                                                                                  |   |   |   |   |    |
|---------------|------------------------------------------------------------------------------------------------------------------------------------------------------------------------------------------------------------------|---|---|---|---|----|
| Garage        | 1                                                                                                                                                                                                                | 2 | 3 | 4 | 5 | 14 |
| Date of Visit | ____ / ____ / ____                                                                                                                                                                                               |   |   |   |   | 30 |
| Observer:     | <div style="display: inline-block; width: 40px; height: 20px; border: 1px solid black; margin-right: 5px;"></div> <div style="display: inline-block; width: 40px; height: 20px; border: 1px solid black;"></div> |   |   |   |   | 15 |

## Garage Environmental Assessment Form: Outdoor Areas

**Instructions:** Complete one form per garage. Include only those items that are IN SIGHT of the garage.

### OUTDOOR PHYSICAL ACTIVITY ENVIRONMENT

|                                   |                                                                 |        |
|-----------------------------------|-----------------------------------------------------------------|--------|
| 1. Bike racks                     | 1 <input type="checkbox"/> Yes<br>2 <input type="checkbox"/> No | Notes: |
| <hr/>                             |                                                                 |        |
| 2. Walking area: garage perimeter | 1 <input type="checkbox"/> Yes<br>2 <input type="checkbox"/> No | Notes: |
| <hr/>                             |                                                                 |        |
| 3. Park                           | 1 <input type="checkbox"/> Yes<br>2 <input type="checkbox"/> No | Notes: |
| <hr/>                             |                                                                 |        |
| 4. Walking trails                 | 1 <input type="checkbox"/> Yes<br>2 <input type="checkbox"/> No | Notes: |
| <hr/>                             |                                                                 |        |
| 5. Bike trails                    | 1 <input type="checkbox"/> Yes<br>2 <input type="checkbox"/> No | Notes: |
| <hr/>                             |                                                                 |        |
| 6. Basketball hoop/court          | 1 <input type="checkbox"/> Yes<br>2 <input type="checkbox"/> No | Notes: |
| <hr/>                             |                                                                 |        |
| 7. Garden area                    | 1 <input type="checkbox"/> Yes<br>2 <input type="checkbox"/> No | Notes: |
| <hr/>                             |                                                                 |        |
| 8. Skyways within sight           | 1 <input type="checkbox"/> Yes<br>2 <input type="checkbox"/> No | Notes: |
| <hr/>                             |                                                                 |        |
| 9. Health clubs within sight      | 1 <input type="checkbox"/> Yes<br>2 <input type="checkbox"/> No | Notes: |
| <hr/>                             |                                                                 |        |

36-44

continues on next page

|                           |                                                                 | Number                                    | Notes |
|---------------------------|-----------------------------------------------------------------|-------------------------------------------|-------|
| 10. Fast food restaurants | 1 <input type="checkbox"/> Yes<br>2 <input type="checkbox"/> No | <input type="text"/> <input type="text"/> | 45    |
| 11. Other restaurants     | 1 <input type="checkbox"/> Yes<br>2 <input type="checkbox"/> No | <input type="text"/> <input type="text"/> | 48    |
| 12. Convenience stores    | 1 <input type="checkbox"/> Yes<br>2 <input type="checkbox"/> No | <input type="text"/> <input type="text"/> | 51    |
| 13. Grocery stores        | 1 <input type="checkbox"/> Yes<br>2 <input type="checkbox"/> No | <input type="text"/> <input type="text"/> | 54    |
